# Supplementary material for: Fat-Soluble Vitamins Deficiency in Pediatric Cholestasis: A Scoping Review
Source: MDPI journal article supplement (doi:10.3390/nu15112491), 2023-05-26
Supplement: s1 [file s1]

**Supplementary Table S1.** Comparison of risk of vitamin K deficiency bleeding (VKDB) in infants with biliary atresia with different prophylactic regimens.

|                                                                   | Netherlands,<br>1991-2003                                                        | Denmark,<br>1994- May 2000                                                                    | Denmark,<br>June 2000-2005                                      |
|-------------------------------------------------------------------|----------------------------------------------------------------------------------|-----------------------------------------------------------------------------------------------|-----------------------------------------------------------------|
| Breastfed                                                         | 1 mg oral vit K at birth + 25 µg daily oral prophylaxis<br>N= 30<br>(VKDB) n= 25 | 2 mg oral vitamin K at birth followed by 1 mg weekly oral prophylaxis<br>N= 13<br>(VKDB) n= 1 | 2 mg intramuscular prophylaxis at birth<br>N= 10<br>(VKDB) n= 1 |
| Fed with formula                                                  | N= 98<br>(VKDB) n= 1                                                             |                                                                                               |                                                                 |
| Relative risk of bleeding in breastfed versus formula-fed infants | RR= 77,5                                                                         | RR= 7,2                                                                                       | RR= 9,3                                                         |

**Supplementary Table S2.** Comparison of vitamin K deficiency bleeding (VKDB) in different prophylactic regimens in breastfed infants with biliary atresia

| Netherlands, 01/1991-02/2011                                                           | Netherlands, 03/2011-01/2015                                                                               | Denmark, 07/ 2000-11/2014                                            |
|----------------------------------------------------------------------------------------|------------------------------------------------------------------------------------------------------------|----------------------------------------------------------------------|
| 1 mg oral vit K at birth + 25 µg daily oral prophylaxis<br>N= 55<br>(VKDB) n= 45 (82%) | 1 mg of oral vitamin K at birth followed by 150 µg of daily oral prophylaxis<br>N= 11<br>(VKDB) n= 9 (82%) | 2 mg intramuscular prophylaxis at birth<br>N= 25<br>(VKDB) n= 1 (4%) |

VKDB= bleeding depending from vitamin K deficiency
